# Supplementary material for: Trends in Severe Outcomes Among Adult and Pediatric Patients Hospitalized With COVID-19 in the Canadian Nosocomial Infection Surveillance Program, March 2020 to May 2022
Source: PubMed Central journal article supplement (PMC10119741; doi:10.1001/jamanetworkopen.2023.9050), 2023-04-20
Supplement: jamanetwopen-e239050-s001.pdf [file jamanetwopen-e239050-s001.pdf]

## Data Sharing Statement

Mitchell. Trends in Severe Outcomes Among Adult and Pediatric Patients Hospitalized With COVID-19 in the Canadian Nosocomial Infection Surveillance Program, March 2020 to May 2022. *JAMA Netw Open*. Published April 20, 2023. doi:10.1001/jamanetworkopen.2023.9050

### Data

**Data available:** Yes

**Data types:** Deidentified aggregate data, Data dictionary

**How to access data:** The study protocol is available. Data sharing requests will be considered and reviewed by the Public Health Agency of Canada and individual site investigators.

**When available:** With publication

### Supporting Documents

**Document types:** None

### Additional Information

**Who can access the data:** Researchers whose proposed use of the data has been approved.

**Types of analyses:** Data will be made available for the purpose of replication.

**Mechanisms of data availability:** Data will be made available after approval of a data sharing request and a signed data sharing agreement.
